# Supplementary material for: Endothelin B Receptor Immunodynamics in Pulmonary Arterial Hypertension
Source: PubMed Central journal article supplement (PMC9221837; doi:10.3389/fimmu.2022.895501), 2022-06-09
Supplement: DataSheet_1.pdf [file DataSheet_1.pdf]

## ***Supplementary Material***

### ***Supplementary Figures and Tables***

## Supplementary Figure 1

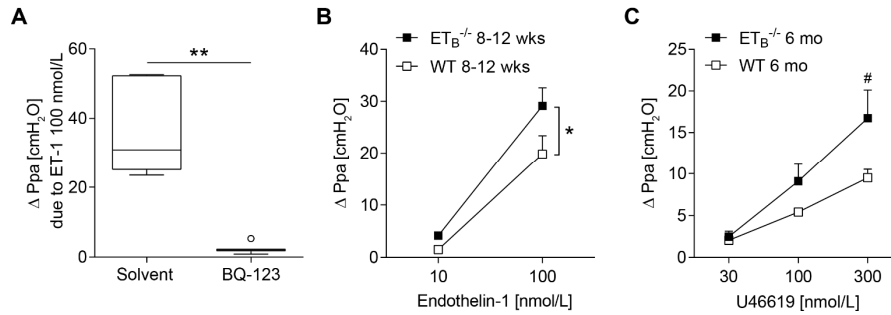

**Supplementary Figure 1: *ET<sub>A</sub>* inhibition reduced and *ET<sub>B</sub>* deficiency increased pulmonary vascular responsiveness.** Lungs of 8-12 weeks (wks) and 6 months (mo) old rescued endothelin B receptor-deficient (*ET<sub>B</sub><sup>-/-</sup>*) and corresponding wild-type (WT) mice were prepared. **(A)** In isolated perfused and ventilated lungs of 8-12 wks old WT mice, application of the endothelin A receptor inhibitor BQ-123 (8 μM) almost completely reduced the pulmonary arterial pressure response to endothelin-1 (ET-1). **(B-C)** In isolated perfused lungs of 8-12 wks or 6 mo old mice, pulmonary vascular responsiveness to ET-1 **(B)** or thromboxane analog U46619 **(C)** was increased in *ET<sub>B</sub><sup>-/-</sup>* compared to WT mice. Data (Δ Ppa) represent the difference between the highest pressure response to the respective stimulus and the basal Ppa. In **(A)**, data are represented as *box plots* depicting median, quartiles, and ranges excluding outliers (*open circles*), and analyzed using Mann-Whitney U test; N=5-7. In **(B-C)**, values are given as mean and SEM, and analyzed using two-way repeated measures ANOVA (\*); N=7 each group. In **(C)**, additional Mann-Whitney U test was performed comparing values of both groups at the highest dose of U46619 (#). \*/#p<0.05, \*\*p<0.01.

## Supplementary Figure 2

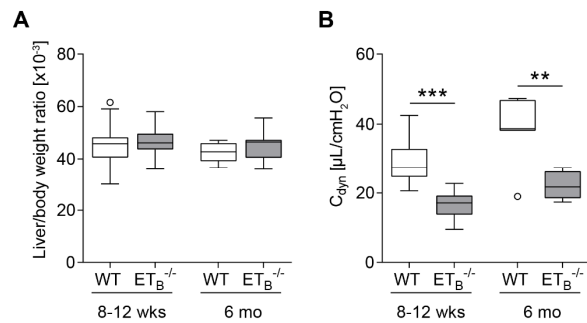

**Supplementary Figure 2:  $ET_B$  deficiency was associated with reduced dynamic lung compliance.** Lungs of 8-12 weeks (wks) and 6 months (mo) old rescued endothelin B receptor-deficient ( $ET_B^{-/-}$ ) and corresponding wild-type (WT) mice were prepared and livers were removed. **(A)** Liver weight related to body weight was similar in all groups. **(B)** In isolated perfused and ventilated lungs, dynamic lung compliance ( $C_{dyn}$ ) was decreased in  $ET_B^{-/-}$  compared to WT mice, independent of age. Data are represented as *box plots* depicting median, quartiles, and ranges excluding outliers (*open circles*); N=7-28. \*\* $p < 0.01$ , \*\*\* $p < 0.001$  (Mann-Whitney U test).

### Supplementary Figure 3

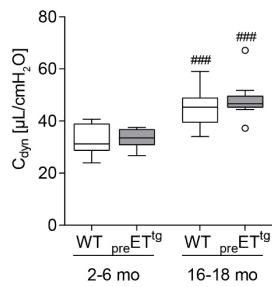

**Supplementary Figure 3: Dynamic lung compliance in prepro-endothelin-1 overexpressing mice.**

Lungs of 2-6 months (mo) or 16-18 mo old prepro-endothelin-1 overexpressing (<sub>pre</sub>ET<sup>tg</sup>) mice and corresponding wild-type (WT) mice were prepared. In isolated perfused and ventilated lungs, dynamic lung compliance was comparable in both groups of the same age. Data are represented as *box plots* depicting median, quartiles, and ranges excluding outliers (*open circles*); N=7-12; # indicates significant difference between 16-18 mo vs. 2-6 mo old groups. ###p<0.001 (Mann-Whitney U test).

## Supplementary Figure 4

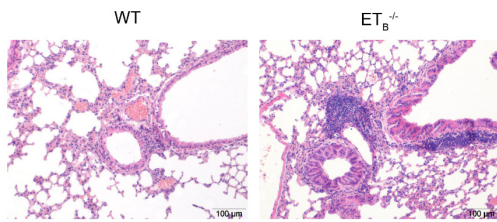

**Supplementary Figure 4:  $ET_B$  deficiency was associated with perivascular lymphocytic infiltrates in the lung.** Lungs of rescued endothelin B receptor-deficient ( $ET_B^{-/-}$ ) and corresponding wild-type (WT) mice were harvested and lung tissue sections stained with hematoxylin and eosin. Representative images (N=20-25 per group) of  $\geq 12$  mo old mice are shown (identical lungs as shown in Figure 4, here with lower magnification for a broader overview). Scale bars represent 100  $\mu\text{m}$ .

## Supplementary Figure 5

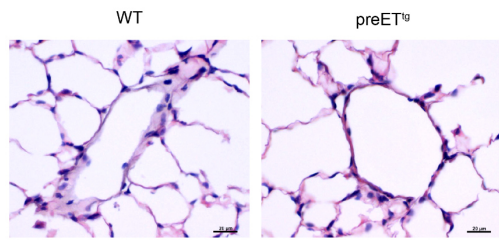

**Supplementary Figure 5: The perivascular space of small pulmonary arteries was unaltered in prepro-endothelin-1 overexpressing mice compared to wild-type mice.** Lungs of prepro-endothelin-1 overexpressing ( $preET^{10}$ ) mice and corresponding wild-type (WT) mice were harvested and lung tissue sections stained with hematoxylin and eosin. Representative images (N=23-32 per group) of  $\geq 12$  mo old mice are shown. Scale bars represent 20  $\mu\text{m}$ .

## Supplementary Figure 6

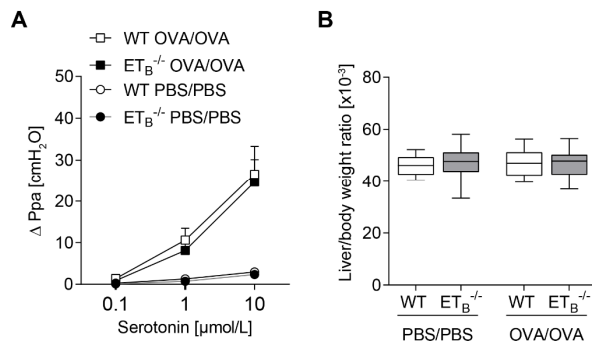

**Supplementary Figure 6: *ET<sub>B</sub>* deficiency did not affect *Th2*-mediated pulmonary vascular hyperresponsiveness to serotonin.** Rescued endothelin B receptor-deficient (*ET<sub>B</sub><sup>-/-</sup>*) and corresponding wild-type (WT) mice were systemically sensitized with OVA (or PBS as control) and repeatedly exposed to aerosolized OVA (OVA/OVA) or PBS (PBS/PBS). Forty-eight hours after the last challenge, lungs were prepared and livers were removed. **(A)** In isolated perfused and ventilated lungs, pulmonary vascular responsiveness to increasing concentrations of serotonin was determined. Data ( $\Delta$  Ppa) represent the difference between the highest pressure response to serotonin and the basal Ppa. **(B)** Liver weight was determined and related to body weight. In **(A)**, values are given as mean and SEM, and analyzed using two-way repeated measures ANOVA (N=5-7). In **(B)**, data are represented as *box plots* depicting median, quartiles, and ranges excluding outliers (*open circles*), and analyzed using Mann-Whitney U test (N=13-14).

## Supplementary Figure 7

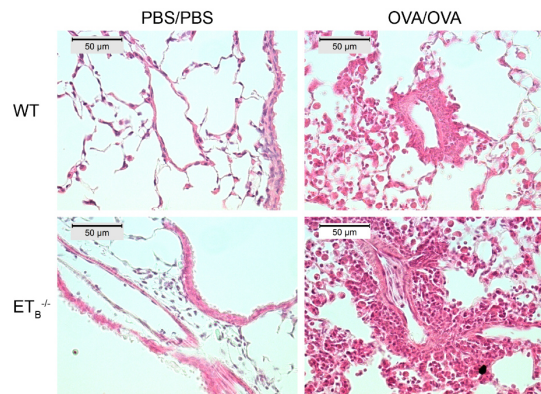

**Supplementary Figure 7: *ET<sub>B</sub>* deficiency aggravated *Th2*-induced perivascular inflammation in the lung.** Rescued endothelin B receptor-deficient ( $ET_B^{-/-}$ ) and corresponding wild-type (WT) mice were systemically sensitized with OVA (or PBS as control) and repeatedly exposed to aerosolized OVA (OVA/OVA) or PBS (PBS/PBS). Forty-eight hours after the last challenge, lungs were removed and fixed. Lung tissue sections were stained with hematoxylin and eosin. Representative images (n=7) per group are shown.



## Supplementary Figure 8

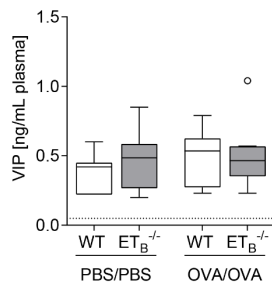

**Supplementary Figure 8: Quantification of plasma levels of vasoactive intestinal peptide (VIP).**

Rescued endothelin B receptor-deficient (ET<sub>B</sub><sup>-/-</sup>) and corresponding wild-type (WT) mice were systemically sensitized with OVA (or PBS as control) and repeatedly exposed to aerosolized OVA (OVA/OVA) or PBS (PBS/PBS). Forty-eight hours after the last challenge, plasma samples were collected and stored at -80°C. VIP levels in plasma were quantified by EIA. The detection limit was 0.05 ng/mL (dotted line). Data are represented as *box plots* depicting median, quartiles, and ranges excluding outliers (*open circles*), and analyzed using Mann-Whitney U test (N=7-8 per group).

## Supplementary Table 1

### Clinical characteristics

| Characteristic                                                                                                                                                                                                                                                                                                                                                                                                                                                                                                                                                           | HD              | iPAH                 | SSc w/o PAH<br>+/- ILD | SSc w/ PAH<br>+/- ILD |
|--------------------------------------------------------------------------------------------------------------------------------------------------------------------------------------------------------------------------------------------------------------------------------------------------------------------------------------------------------------------------------------------------------------------------------------------------------------------------------------------------------------------------------------------------------------------------|-----------------|----------------------|------------------------|-----------------------|
| Patients (no.)                                                                                                                                                                                                                                                                                                                                                                                                                                                                                                                                                           | 26              | 10                   | 143                    | 34                    |
| Median age (range) – years                                                                                                                                                                                                                                                                                                                                                                                                                                                                                                                                               | 30<br>(23 – 82) | 65<br>(44 – 77)      | 59<br>(26 – 87)        | 69<br>(41 – 91)       |
| Female sex – no. (%)                                                                                                                                                                                                                                                                                                                                                                                                                                                                                                                                                     | 15<br>(58)      | 8<br>(80)            | 115<br>(80)            | 28<br>(82)            |
| Laboratory findings                                                                                                                                                                                                                                                                                                                                                                                                                                                                                                                                                      |                 |                      |                        |                       |
| Anti-nuclear antibody (ANA) – %                                                                                                                                                                                                                                                                                                                                                                                                                                                                                                                                          |                 | 10                   | 92                     | 91                    |
| Anti-Scl70 antibody (anti-topoisomerase 1-antibody) – %                                                                                                                                                                                                                                                                                                                                                                                                                                                                                                                  |                 | 0                    | 39                     | 26                    |
| Anti-centromere antibody – %                                                                                                                                                                                                                                                                                                                                                                                                                                                                                                                                             |                 | 0                    | 32                     | 55                    |
| Anti-RNA polymerase III antibody – %                                                                                                                                                                                                                                                                                                                                                                                                                                                                                                                                     |                 | 0                    | 7                      | 9                     |
| Median NT-proBNP (range) – ng/L                                                                                                                                                                                                                                                                                                                                                                                                                                                                                                                                          |                 | 345<br>(200 – 22764) | 113<br>(10 – 7968)     | 956<br>(113 – 7510)   |
| SSc disease course                                                                                                                                                                                                                                                                                                                                                                                                                                                                                                                                                       |                 |                      |                        |                       |
| Median disease duration (range) – years                                                                                                                                                                                                                                                                                                                                                                                                                                                                                                                                  |                 |                      | 7<br>(0 – 39)          | 7<br>(0 – 54)         |
| Raynaud symptoms – %                                                                                                                                                                                                                                                                                                                                                                                                                                                                                                                                                     |                 |                      | 85                     | 97                    |
| Limited cutaneous Systemic Sclerosis (lcSSc) – %                                                                                                                                                                                                                                                                                                                                                                                                                                                                                                                         |                 |                      | 62                     | 68                    |
| Diffuse cutaneous Systemic Sclerosis (dcSSc) – %                                                                                                                                                                                                                                                                                                                                                                                                                                                                                                                         |                 |                      | 32                     | 32                    |
| Systemic Sclerosis sine scleroderma – %                                                                                                                                                                                                                                                                                                                                                                                                                                                                                                                                  |                 |                      | 6                      | 0                     |
| Interstitial lung disease (ILD) – %                                                                                                                                                                                                                                                                                                                                                                                                                                                                                                                                      |                 |                      | 48                     | 56                    |
| Scleroderma renal crisis (SRC) – %                                                                                                                                                                                                                                                                                                                                                                                                                                                                                                                                       |                 |                      | 4                      | 6                     |
| Digital ulcers – %                                                                                                                                                                                                                                                                                                                                                                                                                                                                                                                                                       |                 |                      | 42                     | 26                    |
| Cardiopulmonary parameters                                                                                                                                                                                                                                                                                                                                                                                                                                                                                                                                               |                 |                      |                        |                       |
| Median LVEF (range) – %                                                                                                                                                                                                                                                                                                                                                                                                                                                                                                                                                  |                 | 63<br>(55 – 75)      | 60<br>(22 – 91)        | 60<br>(50 – 68)       |
| Median DLCO <sub>SB</sub> (range) – %                                                                                                                                                                                                                                                                                                                                                                                                                                                                                                                                    |                 | 63<br>(21 – 93)      | 56<br>(17 – 95)        | 36<br>(19 – 77)       |
| Median FEV <sub>1</sub> (range) – %                                                                                                                                                                                                                                                                                                                                                                                                                                                                                                                                      |                 | 72<br>(50 – 106)     | 91<br>(30 – 133)       | 80<br>(33 – 133)      |
| Median FVC (range) – %                                                                                                                                                                                                                                                                                                                                                                                                                                                                                                                                                   |                 | 77<br>(50 – 107)     | 94<br>(29 – 138)       | 82<br>(47 – 150)      |
| Therapy                                                                                                                                                                                                                                                                                                                                                                                                                                                                                                                                                                  |                 |                      |                        |                       |
| Calcium channel blockers – %                                                                                                                                                                                                                                                                                                                                                                                                                                                                                                                                             |                 | 10                   | 43                     | 15                    |
| Median no. systemic PAH-specific therapy (range)                                                                                                                                                                                                                                                                                                                                                                                                                                                                                                                         |                 | 2<br>(0 – 3)         |                        | 1<br>(0 – 3)          |
| PAH-specific monotherapy – %                                                                                                                                                                                                                                                                                                                                                                                                                                                                                                                                             |                 | 20                   |                        | 53                    |
| PAH-specific dual therapy – %                                                                                                                                                                                                                                                                                                                                                                                                                                                                                                                                            |                 | 50                   |                        | 35                    |
| PAH-specific tripple therapy – %                                                                                                                                                                                                                                                                                                                                                                                                                                                                                                                                         |                 | 20                   |                        | 3                     |
| Intermittent prostacyclin analoga infusion – %                                                                                                                                                                                                                                                                                                                                                                                                                                                                                                                           |                 | 20                   | 50                     | 18                    |
| <p>Disease duration refers to the time since first non-Raynaud symptom. Abbreviations: DLCO<sub>SB</sub>, Single-breath diffusing capacity for carbon monoxide; FEV<sub>1</sub>, forced expiratory volume per second; FVC, forced vital capacity; HD, healthy donors; ILD, interstitial lung disease; iPAH, idiopathic pulmonary arterial hypertension; L, liter; LVEF, left ventricular ejection fraction; no., number; NT-proBNP, N-terminal-pro-brain natriuretic peptide; PAH, pulmonary arterial hypertension; SSc, Systemic Sclerosis; w/, with; w/o, without.</p> |                 |                      |                        |                       |

## Supplementary Table 2

Cytokine levels in bronchoalveolar lavage

| Cytokine     | Detection range        | WT PBS/PBS       | ET <sub>B</sub> <sup>-/-</sup> PBS/PBS | WT OVA/OVA         | ET <sub>B</sub> <sup>-/-</sup> OVA/OVA |
|--------------|------------------------|------------------|----------------------------------------|--------------------|----------------------------------------|
| IL-1 $\beta$ | 6.24-23,002 pg/mL      | 6.24 $\pm$ 0     | 6.24 $\pm$ 0                           | 7.64 $\pm$ 0.90    | 7.02 $\pm$ 0.50                        |
| IL-2         | 0.91-3,939 pg/mL       | 1.90 $\pm$ 0.13  | 1.62 $\pm$ 0.71                        | 2.08 $\pm$ 0.31    | 1.36 $\pm$ 0.13 *                      |
| IL-4         | 1.01-14,576 pg/mL      | 1.01 $\pm$ 0     | 1.01 $\pm$ 0                           | 7.01 $\pm$ 4.28 #  | 4.15 $\pm$ 1.78                        |
| IL-5         | 0.45-1,804 pg/mL       | 0.51 $\pm$ 0.06  | 0.57 $\pm$ 0.09                        | 7.43 $\pm$ 2.20 ## | 4.31 $\pm$ 1.15 #                      |
| IL-13        | 3.62 – 58,768<br>pg/mL | 4.56 $\pm$ 0.62  | 4.15 $\pm$ 0.53                        | 25.04 $\pm$ 7.79 # | 21.78 $\pm$ 5.50 #                     |
| KC           | 2.4 – 41,653 pg/mL     | 1,261 $\pm$ 481  | 953 $\pm$ 480                          | 812 $\pm$ 282      | 780 $\pm$ 114                          |
| RANTES       | 5.27 – 16,749<br>pg/mL | 10.25 $\pm$ 2.04 | 9.33 $\pm$ 2.99                        | 9.09 $\pm$ 1.50    | 9.36 $\pm$ 0.74                        |
| G-CSF        | 0.73 – 3,375 pg/mL     | 29.60 $\pm$ 8.34 | 19.77 $\pm$ 4.77                       | 92.70 $\pm$ 29.00  | 142 $\pm$ 25.84 #                      |

Data are mean values  $\pm$  SEM (pg/mL); N=3-5 (PBS/PBS) or N=6 (OVA/OVA). # indicates significant difference between OVA/OVA vs. corresponding PBS/PBS group, \* indicates significant difference between ET<sub>B</sub><sup>-/-</sup> vs. corresponding WT group. \*/#p<0.05, ##p<0.01 (Mann-Whitney U test). Abbreviations: G-CSF, granulocyte-colony-stimulating factor; IL, interleukin; KC, keratinocyte chemoattractant; RANTES, regulated upon activation normal T cell expressed and secreted.
